# Supplementary material for: The Association Between Vasopressin and Adverse Kidney Outcomes in Children and Young Adults Requiring Vasopressors on Continuous Renal Replacement Therapy
Source: PubMed Central journal article supplement — Crit Care Explor. 2024 Sep 24;6(10):e1156. doi: 10.1097/CCE.0000000000001156 (PMC11419489; doi:10.1097/cce.0000000000001156), 2024-09-24
Supplement: cc9-6-e1156-s001.pdf [file cc9-6-e1156-s001.pdf]

## Supplemental Digital Content

### The Association Between Vasopressin and Adverse Kidney Outcomes in Children and Young Adults Requiring Vasopressors on Continuous Renal Replacement Therapy

Denise C. Hasson<sup>1</sup>, Katja M. Gist<sup>2</sup>, JangDong Seo<sup>3</sup>, Erin K. Stenson<sup>4</sup>, Aaron Kessel<sup>5</sup>, Taiki Haga<sup>6</sup>, Sara LaFever<sup>7</sup>, Maria Jose Santiago<sup>7</sup>, Matthew Barhight<sup>8</sup>, David Selewski<sup>9</sup>, Zaccaria Ricci<sup>10</sup>, Nicholas J. Ollberding<sup>3</sup>, Natalja L. Stanski<sup>11</sup> on behalf of the WE-ROCK Collaborative

#### Affiliations:

<sup>1</sup>Hassenfeld Children's Hospital at New York University Langone Health, Division of Pediatric Critical Care Medicine; New York, New York, USA

<sup>2</sup>Cincinnati Children's Hospital Medical Center, Division of Cardiac Critical Care Medicine; Cincinnati, Ohio, USA

<sup>3</sup>Cincinnati Children's Hospital Medical Center, Division of Biostatistics and the University of Cincinnati, College of Medicine; Cincinnati, Ohio, USA

<sup>4</sup>University of Colorado Anschutz Medical Campus, Children's Hospital Colorado, Division of Pediatric Critical Care Medicine; Aurora, CO, USA

<sup>5</sup>Northwell Health, Cohen Children's Hospital Medical Center, Division of Critical Care Medicine; New Hyde Park, NY, USA

<sup>6</sup>Osaka City General Hospital, Department of Critical Care Medicine, Osaka, Japan

<sup>7</sup>Hospital General Universitario Gregorio Marañón, Pediatric Intensive Care Unit and Pediatrics Department, Universidad Complutense de Madrid, Spain.

<sup>8</sup>Ann and Robert H. Lurie Children's Hospital of Chicago, Division of Critical Care Medicine; Chicago, IL, USA

<sup>9</sup>Medical University of South Carolina, Division of Pediatric Nephrology, Charleston, South Carolina, USA

<sup>10</sup>Meyer Children's Hospital IRCCS, Department of Pediatrics, Florence, Italy

<sup>11</sup>Cincinnati Children's Hospital Medical Center, Division of Critical Care Medicine; Cincinnati, Ohio, USA

**Table of Contents:**

|                                   |           |
|-----------------------------------|-----------|
| <b>Supplemental Methods.....</b>  | <b>3</b>  |
| <b>Supplemental Tables.....</b>   | <b>4</b>  |
| <b>Supplemental Table 1.....</b>  | <b>4</b>  |
| <b>Supplemental Table 2.....</b>  | <b>5</b>  |
| <b>Supplemental Table 3.....</b>  | <b>6</b>  |
| <b>Supplemental Table 4.....</b>  | <b>7</b>  |
| <b>Supplemental Table 5.....</b>  | <b>8</b>  |
| <b>Supplemental Table 6.....</b>  | <b>9</b>  |
| <b>Supplemental Table 7.....</b>  | <b>9</b>  |
| <b>Supplemental Figures.....</b>  | <b>10</b> |
| <b>Supplemental Figure 1.....</b> | <b>10</b> |
| <b>Supplemental Figure 2.....</b> | <b>10</b> |
| <b>Appendix 1.....</b>            | <b>11</b> |
| <b>Appendix 2.....</b>            | <b>13</b> |

### **Supplemental Methods**

VA exposure was quantified by the fraction of total vasoactive load (by VIS) contributed by VA each day:

$$\%VIS\ VA = [10 * VA\ (mU/kg/min) / (VIS)] * 100$$

To characterize the trend in VIS each day of CRRT, for each patient we calculated a daily percent change in VIS using the formula:  $\%Change\ VIS = [(VIS\ CRRT\ Day\ (n+1) / VIS\ CRRT\ Day\ n) - 1] * 100$ .

For patients with VIS CRRT Day (n+1) = 0 (i.e., they are now off vasoactives but were on the day prior), -100% was imputed; for patients with VIS CRRT Day n=0 (i.e., they are now on vasoactives but were not the day prior), +100% was imputed.

Percent fluid balance from ICU admission to CRRT initiation was calculated using the standard formula:

$$\%Fluid\ Balance = [(Total\ fluid\ in\ (mL) - Total\ fluid\ out\ (mL)) / ICU\ admit\ weight\ (kg)] * 100$$

**Supplemental Tables:**

**Supplemental Table 1:** Comparison of daily vasoactive inotropic score (VIS) for each day of CRRT in children who received vasopressin (VA Group) versus those who did not (No VA Group) and fraction of daily VIS from vasopressin in VA Group patients.

| <b>CRRT Day</b> | <b>No VA Group VIS<br/>N=417</b> | <b>VA Group VIS<br/>N=248</b> | <b>p</b> | <b>%Daily VIS from VA</b> |
|-----------------|----------------------------------|-------------------------------|----------|---------------------------|
| <b>0</b>        | 7 (2, 20)                        | 19 (8, 39)                    | <0.001   | 18 (3, 37)                |
| <b>1</b>        | 5 (0, 15)                        | 16 (5, 32)                    | <0.001   | 19 (0, 39)                |
| <b>2</b>        | 3 (0, 10)                        | 10 (2, 23)                    | <0.001   | 17 (0, 41)                |
| <b>3</b>        | 2 (0, 7)                         | 7 (1, 21)                     | <0.001   | 19 (0, 46)                |
| <b>4</b>        | 0 (0, 6)                         | 6 (0, 18)                     | <0.001   | 17 (0, 50)                |
| <b>5</b>        | 0 (0, 6)                         | 4 (0, 13)                     | <0.001   | 2 (0, 55)                 |
| <b>6</b>        | 0 (0, 5)                         | 4 (0, 14)                     | <0.001   | 0 (0, 60)                 |
| <b>7</b>        | 0 (0, 5)                         | 3 (0, 12)                     | 0.013    | 13 (0, 56)                |

Continuous variables presented as median (IQR). CRRT- continuous renal replacement therapy; VA-vasopressin; VIS- vasoactive-inotropic score

**Supplemental Table 2:** Demographic, clinical characteristics, and outcomes of children with sepsis requiring vasopressors while receiving continuous renal replacement therapy (CRRT) who received vasopressin compared to those who did not.

| Variable                                   | All<br>(n=343) | No VA<br>(n= 197) | VA<br>(n= 146)  | p      |
|--------------------------------------------|----------------|-------------------|-----------------|--------|
| <b>Demographics</b>                        |                |                   |                 |        |
| Age, years                                 | 10 (2.3,15.3)  | 8.8 (2,15)        | 10.5 (2.5,15.6) | 0.62   |
| Sex                                        |                |                   |                 |        |
| Female (%)                                 | 162 (47)       | 91 (46)           | 71 (49)         | 0.66   |
| Male (%)                                   | 181 (53)       | 106 (54)          | 75 (51)         |        |
| Admission weight, kg                       | 31 (13,58)     | 28 (13,57)        | 33 (13,59)      | 0.49   |
| Admission Diagnosis, n (%)                 |                |                   |                 | 0.92   |
| Shock/Infection/Major Trauma               | 200 (58)       | 111 (56)          | 89 (61)         |        |
| Respiratory Failure                        | 67 (20)        | 39 (20)           | 28 (19)         |        |
| CNS Dysfunction                            | 13 (4)         | 9 (5)             | 4 (3)           |        |
| Post-surgical/Minor Trauma                 | 11 (3)         | 5 (3)             | 6 (4)           |        |
| Primary Cardiac                            | 25 (7)         | 15 (8)            | 10 (7)          |        |
| Other                                      | 27 (8)         | 18 (9)            | 9 (6)           |        |
| Comorbidities, n (%)                       |                |                   |                 | 0.58   |
| 0                                          | 65 (19)        | 36 (18)           | 29 (20)         |        |
| 1                                          | 158 (46)       | 88 (45)           | 70 (48)         |        |
| 2                                          | 71 (21)        | 46 (23)           | 25 (17)         |        |
| >2                                         | 49 (14)        | 27 (14)           | 22 (15)         |        |
| PRISM III                                  | 16 (11,20)     | 15 (11,19)        | 16 (12,22)      | 0.06   |
| <b>CRRT Initiation Data</b>                |                |                   |                 |        |
| Time from ICU Admission to CRRT, days      | 2 (1,7)        | 2 (1,6)           | 2 (1,8)         | 0.95   |
| PELOD-2                                    | 7 (4,10)       | 7 (4,9)           | 8 (4,11)        | 0.041  |
| Receipt of Vasopressors, n (%)             | 286 (84)       | 152 (78)          | 134 (92)        | <0.001 |
| Pre-CRRT VIS                               | 15 (5,38)      | 10 (3,27)         | 28 (12,47)      | <0.001 |
| Mechanical Ventilation, n (%)              | 331 (97)       | 189 (96)          | 142 (97)        | 0.51   |
| Urine Output 24 hours Prior, ml/kg/hr      | 0.4 (0.13,1.2) | 0.5 (0.14,1.3)    | 0.36 (0.1,1)    | 0.11   |
| Time to First Negative Fluid Balance, days | 1 (0,1)        | 1 (0,1)           | 1 (0,1)         | 0.44   |
| <b>Outcomes</b>                            |                |                   |                 |        |
| 28-day CRRT Liberation Status, n (%)       |                |                   |                 | 0.02   |
| Liberated                                  | 94 (27)        | 65 (33)           | 29 (20)         |        |
| Liberation not attempted                   | 162 (47)       | 83 (42)           | 79 (54)         |        |
| Reinstituted                               | 87 (25)        | 49 (25)           | 28 (26)         |        |
| CRRT Duration, days                        | 7 (4,16)       | 7 (4,16)          | 7 (3,16)        | 0.38   |
| %Day 1-7 of CRRT Requiring Vasopressors    | 83 (43,100)    | 63 (36,100)       | 100 (62,100)    | <0.001 |
| 28-day Ventilator-Free Days                | 0 (0,23)       | 2 (0,28)          | 0 (0,20)        | 0.005  |
| 28-day ICU-Free Days                       | 0 (0,2)        | 0 (0,7)           | 0 (0,0)         | 0.001  |
| In-Hospital Mortality, n (%)               | 162 (47)       | 105 (53)          | 89 (61)         | 0.009  |
| MAKE-90, n (%)                             | 248 (73)       | 128 (66)          | 120 (82)        | 0.001  |
| 90-day mortality, n (%)                    | 181 (53)       | 92 (47)           | 89 (61)         | 0.009  |
| Persistent kidney dysfunction, n (%)       | 53 (15)        | 28 (14)           | 25 (17)         | 0.46   |
| RRT dependence, n (%)                      | 14 (4)         | 8 (4)             | 6 (4)           | 0.98   |

The VA Group consisted of all patients who received vasopressin and/or norepinephrine/epinephrine, while the No VA Group consisted of patients receiving norepinephrine/epinephrine without vasopressin. Continuous variables reported as median (IQR). *p*-values were obtained using Pearson's Chi-squared test, Wilcoxon rank sum test, or Fisher's Exact Test, as appropriate. CNS- central nervous system; PRISM III- Pediatric Risk of Mortality III score; PELOD-2- Pediatric Logistic Organ Dysfunction 2 score; VIS- vasoactive-inotropic score; CRRT- continuous renal replacement therapy

**Supplemental Table 3:** Demographic, clinical characteristics, and outcomes of children who initiated continuous renal replacement therapy (CRRT)  $\leq 2$  days from admission and required vasopressors who received vasopressin compared to those who did not.

| Variable                                   | All<br>(n=342)  | No VA<br>(n=217) | VA<br>(n=125)   | p      |
|--------------------------------------------|-----------------|------------------|-----------------|--------|
| <b>Demographics</b>                        |                 |                  |                 |        |
| Age, years                                 | 8.3 (1.7, 14.9) | 6 (1.2,14.5)     | 10.3 (2.7,15.8) | 0.07   |
| Sex                                        |                 |                  |                 | 0.12   |
| Female (%)                                 | 150 (44)        | 102 (47)         | 48 (38)         |        |
| Male (%)                                   | 192 (46)        | 115 (53)         | 77 (62)         |        |
| Admission weight, kg                       | 25 (12,59)      | 21 (11,60)       | 34 (14,58)      | 0.09   |
| Admission Diagnosis, n (%)                 |                 |                  |                 | 0.038  |
| Shock/Infection/Major Trauma               | 161 (47)        | 88 (41)          | 73 (58)         |        |
| Respiratory Failure                        | 65 (19)         | 45 (21)          | 20 (16)         |        |
| CNS Dysfunction                            | 17 (5)          | 14 (7)           | 3 (2)           |        |
| Post-surgical/Minor Trauma                 | 14 (4)          | 8 (4)            | 6 (5)           |        |
| Primary Cardiac                            | 32 (9)          | 23 (10)          | 9 (1)           |        |
| Other                                      | 53 (16)         | 39 (18)          | 14 (11)         |        |
| Comorbidities, n (%)                       |                 |                  |                 | 0.33   |
| 0                                          | 65 (19)         | 40 (18)          | 25 (20)         |        |
| 1                                          | 167 (49)        | 100 (46)         | 67 (54)         |        |
| 2                                          | 78 (23)         | 56 (26)          | 22 (18)         |        |
| >2                                         | 32 (9)          | 21 (10)          | 11 (9)          |        |
| PRISM III                                  | 16 (12,21)      | 16 (12,20)       | 26 (14,23)      | 0.04   |
| Sepsis, n (%)                              | 189 (55)        | 106 (49)         | 83 (66)         | 0.002  |
| <b>CRRT Initiation Data</b>                |                 |                  |                 |        |
| Time from ICU Admission to CRRT, days      | 1 (0,2)         | 1 (1,2)          | 1 (1,2)         | 0.83   |
| PELOD-2                                    | 7 (4,10)        | 7 (4,9)          | 8 (5,10)        | 0.021  |
| Receipt of Vasopressors, n (%)             | 274 (80)        | 159 (73)         | 115 (92)        | <0.001 |
| Pre-CRRT VIS                               | 16 (4,36)       | 10 (0,27)        | 28 (13,47)      | <0.001 |
| Mechanical Ventilation, n (%)              | 322 (94)        | 204 (94)         | 118 (95)        | 0.66   |
| Urine Output 24 hours Prior, ml/kg/hr      | 0.35 (0.1,0.98) | 0.3 (0.1,1.2)    | 0.3 (0.1,0.88)  | 0.32   |
| Time to First Negative Fluid Balance, days | 1 (0,2)         | 1 (0,2)          | 1 (0,20)        | 0.53   |
| <b>Outcomes</b>                            |                 |                  |                 |        |
| 28-day CRRT Liberation Status, n (%)       |                 |                  |                 | 0.031  |
| Liberated                                  | 102 (30)        | 75 (35)          | 27 (22)         |        |
| Liberation not attempted                   | 155 (45)        | 89 (41)          | 66 (53)         |        |
| Reinstituted                               | 85 (25)         | 53 (24)          | 32 (26)         |        |
| CRRT Duration, days                        | 7 (3,15)        | 7 (3,14)         | 6 (2,16)        | 0.60   |
| %Day 1-7 of CRRT Requiring Vasopressors    | 75 (40,100)     | 63 (38,100)      | 100 (63,100)    | <0.001 |
| 28-day Ventilator-Free Days                | 4 (0,28)        | 14 (0,28)        | 0 (0,21)        | 0.011  |
| 28-day ICU-Free Days                       | 0 (0,10)        | 0 (0,12)         | 0 (0,5)         | 0.004  |
| In-Hospital Mortality, n (%)               | 160 (47)        | 93 (43)          | 67 (54)         | 0.06   |
| MAKE-90, n (%)                             | 234 (70)        | 137 (65)         | 97 (78)         | 0.017  |
| 90-day mortality, n (%)                    | 158 (46)        | 92 (42)          | 66 (53)         | 0.06   |
| Persistent kidney dysfunction, n (%)       | 54 (16)         | 29 (13)          | 25 (20)         | 0.11   |
| RRT dependence, n (%)                      | 22 (6)          | 16 (4)           | 6 (5)           | 0.35   |

The VA Group consisted of all patients who received vasopressin and/or norepinephrine/epinephrine, while the No VA Group consisted of patients receiving norepinephrine/epinephrine without vasopressin. Continuous variables reported as median (IQR). *p*-values were obtained using Pearson's Chi-squared test, Wilcoxon rank sum test, or Fisher's Exact Test, as appropriate. CNS- central nervous system; PRISM III- Pediatric Risk of Mortality III score; PELOD-2- Pediatric Logistic Organ Dysfunction 2 score; VIS- vasoactive-inotropic score; CRRT- continuous renal replacement therapy

**Supplemental Table 4:** Comparison of median percent change in vasoactive inotropic score (VIS) for each day of CRRT by timing of vasopressin administration in patients receiving vasopressin (VA Group)

| <b>%Change VIS by CRRT Day</b> | <b>N</b> | <b>Early VA</b> | <b>Intermediate VA</b> | <b>Late VA</b> | <b>p</b> |
|--------------------------------|----------|-----------------|------------------------|----------------|----------|
| <b>Day 1</b>                   | 199      | -18 (-55, 0)    | 100 (31, 188)          | -13 (-92, 75)  | <0.001   |
| <b>Day 2</b>                   | 165      | -25 (-69, 0)    | 10 (-34, 100)          | 0 (-54, 79)    | <0.001   |
| <b>Day 3</b>                   | 132      | -23 (-74, 0)    | -10 (-28, 10)          | 100 (72, 121)  | <0.001   |
| <b>Day 4</b>                   | 108      | -32 (-64, 0)    | -3 (-46, 18)           | 10 (-23, 100)  | 0.024    |
| <b>Day 5</b>                   | 91       | -4 (-52, 40)    | 0 (-35, 20)            | -40 (-74, 0)   | 0.299    |
| <b>Day 6</b>                   | 75       | -14 (-67, 43)   | 19 (-37, 53)           | 40 (-29, 100)  | 0.136    |
| <b>Day 7</b>                   | 64       | -7 (-66, 18)    | 0 (-32, 7)             | 10 (0, 90)     | 0.163    |

Continuous variables reported as median (IQR). Comparisons made via Kruskal-Wallis test. VIS-vasoactive inotropic score; CRRT-continuous renal replacement therapy; VA-vasopressin.

**Supplemental Table 5:** Demographic, clinical characteristics, and outcomes of children with vasodilatory shock receiving CRRT who survived until Day 7 of CRRT or successfully liberated from CRRT by Day 7 based on timing of vasopressin administration (sensitivity analysis cohort)

| Variable                                   | Early VA<br>(n=110) | Intermediate VA<br>(n=28) | Late VA<br>(n=23) | p      |
|--------------------------------------------|---------------------|---------------------------|-------------------|--------|
| <b>Demographics</b>                        |                     |                           |                   |        |
| Age, years                                 | 10.4 (2.8, 15.6)    | 4.7 (1.2, 14.6)           | 10.8 (1.3, 14.5)  | 0.37   |
| Sex, Female (%)                            | 49 (45)             | 12 (43)                   | 13 (57)           | 0.54   |
| Male (%)                                   | 61 (55)             | 16 (57)                   | 10 (43)           |        |
| Admission weight, kg                       | 31 (14, 65)         | 20 (12, 47)               | 38 (10, 51)       | 0.26   |
| Admission Diagnosis, n (%)                 |                     |                           |                   | 0.17   |
| Shock/Infection/Major Trauma               | 54 (49)             | 11 (39)                   | 6 (26)            |        |
| Respiratory Failure                        | 20 (18)             | 7 (25)                    | 7 (30)            |        |
| Post-surgical/Minor Trauma                 | 5 (4.5)             | 3 (11)                    | 1 (4.3)           |        |
| Primary Cardiac                            | 20 (18)             | 3 (11)                    | 6 (26)            |        |
| Other                                      | 11 (10)             | 4 (15)                    | 3 (13)            |        |
| Comorbidities, n (%)                       |                     |                           |                   | 0.22   |
| 0                                          | 24 (22)             | 4 (14)                    | 3 (13)            |        |
| 1                                          | 55 (50)             | 15 (54)                   | 8 (35)            |        |
| 2                                          | 17 (15)             | 4 (14)                    | 9 (39)            |        |
| >2                                         | 14 (13)             | 5 (18)                    | 3 (13)            |        |
| PRISM III                                  | 16 (12, 20)         | 15 (8, 19)                | 13 (10, 18)       | 0.25   |
| Sepsis, n (%)                              | 62 (56)             | 14 (50)                   | 12 (52)           | 0.81   |
| <b>CRRT Initiation Data</b>                |                     |                           |                   |        |
| Time from ICU Admission to CRRT, days      | 2 (1, 9)            | 4 (2, 13)                 | 6 (3, 11)         | 0.13   |
| PELOD-2                                    | 7.0 (4.3, 10.0)     | 7.0 (3.8, 8.3)            | 6.0 (3.5, 10.5)   | 0.75   |
| Receipt of Vasopressors, n (%)             | 105 (95%)           | 22 (79%)                  | 18 (78%)          | 0.002  |
| Pre-CRRT VIS                               | 29 (14, 40)         | 10 (2, 21)                | 5 (2, 15)         | <0.001 |
| Mechanical Ventilation, n (%)              | 107 (97%)           | 27 (96%)                  | 23 (100%)         | >0.99  |
| %Fluid Balance from ICU Admission          | 11 (5, 27)          | 11 (5, 24)                | 13 (4, 25)        | 0.93   |
| Urine Output 24 hours Prior, ml/kg/hr      | 0.40 (0.15, 0.98)   | 0.42 (0.19, 0.93)         | 0.63 (0.32, 1.26) | 0.50   |
| Time to First Negative Fluid Balance, days | 1.00 (0.0, 2.0)     | 1.00 (0.0, 2.0)           | 1.00 (0.0, 1.0)   | 0.39   |
| <b>Outcomes</b>                            |                     |                           |                   |        |
| 28-day CRRT Liberation Status, n (%)       |                     |                           |                   | 0.003  |
| Liberated                                  | 40 (36)             | 8 (29)                    | 5 (22)            |        |
| Liberation not attempted                   | 25 (23)             | 16 (57)                   | 11 (48)           |        |
| Reinstituted                               | 45 (41)             | 4 (14)                    | 7 (30)            |        |
| CRRT Duration, days                        | 12 (6, 21)          | 16 (10, 50)               | 13 (8, 20)        | 0.055  |
| %Day 1-7 of CRRT Requiring Vasopressors    | 83 (50, 100)        | 100 (75, 100)             | 88 (63, 88)       | 0.24   |
| 28-day Ventilator-Free Days                | 16 (0, 28)          | 0 (0, 14)                 | 1 (0, 22)         | 0.022  |
| 28-day ICU-Free Days                       | 0 (0, 7.8)          | 0 (0, 0)                  | 0 (0, 0)          | 0.006  |
| In-Hospital Mortality, n (%)               | 34 (31)             | 13 (46)                   | 11 (48)           | 0.14   |
| MAKE-90, n (%)                             | 68 (62)             | 24 (86)                   | 18 (78)           | 0.029  |
| 90-day mortality, n (%)                    | 30 (27)             | 14 (50)                   | 11 (48)           | 0.025  |
| Persistent kidney dysfunction, n (%)       | 30 (27)             | 4 (14)                    | 5 (22)            | 0.34   |
| RRT dependence, n (%)                      | 8 (7)               | 6 (21)                    | 2 (9)             | 0.08   |

Early VA Group initiated VA on Day 0 of CRRT, Intermediate VA Group initiated VA on Day 1-2 of CRRT, and Late VA Group initiated VA on Days 3-7 of CRRT. Continuous variables reported as median (IQR). p-values were obtained using Pearson's Chi-squared test, Wilcoxon rank sum test, or Fisher's Exact Test, as appropriate. VA-vasopressin; CNS- central nervous system; PRISM III- Pediatric Risk of Mortality III score; PELOD-2- Pediatric Logistic Organ Dysfunction 2 score; VIS- vasoactive-inotropic score; CRRT- continuous renal replacement therapy



**Supplemental Table 6:** Comparison of median daily percent change in vasoactive inotropic score (VIS) for each day of CRRT by timing of vasopressin administration in patients receiving vasopressin who survived until Day 7 of CRRT or successfully liberated from CRRT by Day 7 (sensitivity analysis cohort)

| %Change VIS by CRRT Day | N   | Early VA      | Intermediate VA | Late VA       | p      |
|-------------------------|-----|---------------|-----------------|---------------|--------|
| Day 1                   | 142 | -27 (-64, 0)  | 100 (10, 192)   | -13 (-100, 5) | <0.001 |
| Day 2                   | 126 | -33 (-68, 0)  | -10 (-63, 100)  | -23 (-58, 75) | 0.16   |
| Day 3                   | 108 | -33 (-77, 0)  | -11 (-27, 16)   | 100 (69, 104) | <0.001 |
| Day 4                   | 94  | -38 (-67, 0)  | -13 (-47, 17)   | 0 (-45, 62)   | 0.30   |
| Day 5                   | 82  | -7 (-52, 40)  | -9 (-40, 10)    | -28 (-55, 0)  | 0.60   |
| Day 6                   | 73  | -14 (-67, 43) | 25 (-37, 55)    | 35 (-30, 100) | 0.20   |
| Day 7                   | 64  | -7 (-66, 18)  | 0 (-32, 7)      | 10 (0, 90)    | 0.16   |

Continuous variables reported as median (IQR). Comparisons made via Kruskal-Wallis test. VIS-vasoactive inotropic score, CRRT-continuous renal replacement therapy, VA-vasopressin

**Supplemental Table 7:** Multivariable analyses examining the association between *a priori* selected demographic and clinical variables and the primary outcomes of successful CRRT liberation and development of MAKE-90 in patients receiving vasopressin who survived until Day 7 of CRRT or successfully liberated from CRRT by Day 7 (sensitivity analysis cohort)

| Variable                       | aOR Liberation Success | 95% CI     | p    | aOR MAKE-90 | 95% CI     | p     |
|--------------------------------|------------------------|------------|------|-------------|------------|-------|
| <b>Timing of VA Initiation</b> |                        |            |      |             |            |       |
| Early                          |                        |            |      |             |            |       |
| Intermediate/Late              | 1.60                   | 0.58, 4.43 | 0.37 | 2.54        | 1.07, 6.02 | 0.035 |
| <b>Pre-CRRT PELOD-2</b>        | 0.97                   | 0.88, 1.07 | 0.55 | 1.05        | 0.96, 1.14 | 0.29  |
| <b>Pre-CRRT VIS</b>            | 1.01                   | 0.99, 1.03 | 0.23 | 1.00        | 0.98, 1.01 | 0.54  |
| <b>Pre-CRRT UOP, ml/kg/hr</b>  | 1.45                   | 0.85, 2.50 | 0.18 | 0.96        | 0.61, 1.52 | 0.87  |
| <b>Comorbidities, yes</b>      | 0.65                   | 0.23, 1.81 | 0.41 | 2.19        | 0.93, 5.16 | 0.072 |

Multivariable logistic regression performed with above *a priori* selected variables using mixed-effects logistic regression to adjust for center. VA-vasopressin; UOP-urine output; PELOD-2-Pediatric Logistic Organ Dysfunction 2 score; VIS-vasoactive-inotropic score; CRRT-continuous renal replacement therapy

**Supplemental Figures:**

**Supplemental Figure 1:** Histogram of timing of vasopressin initiation in patients who received vasopressin (VA Group). VA-vasopressin; CRRT-continuous renal replacement therapy.

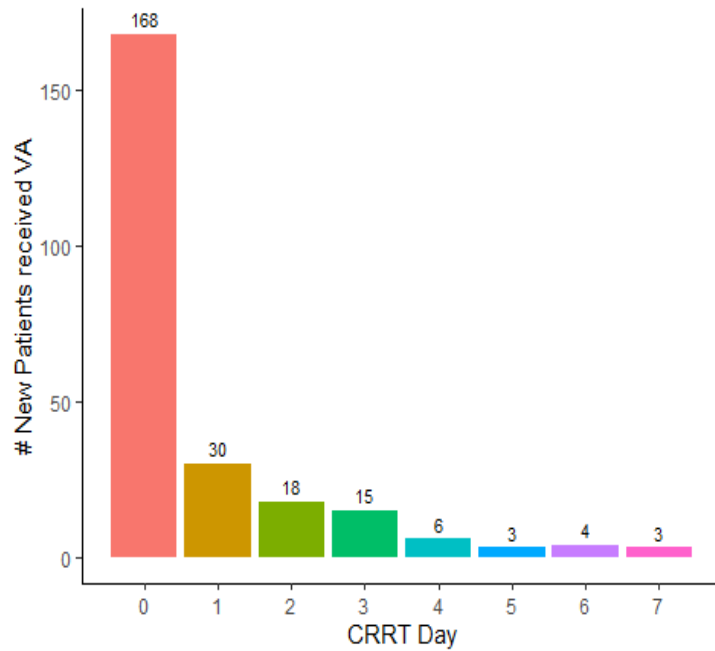

**Supplemental Figure 2:** Median daily percent change in vasoactive inotropic score (VIS) by timing of vasopressin initiation (Early, Intermediate, or Late) in patients receiving vasopressin who survived until Day 7 of CRRT or successfully liberated from CRRT by Day 7 (sensitivity analysis cohort). \* represents statistical significance. VIS-vasoactive inotropic score; CRRT-continuous renal replacement therapy.

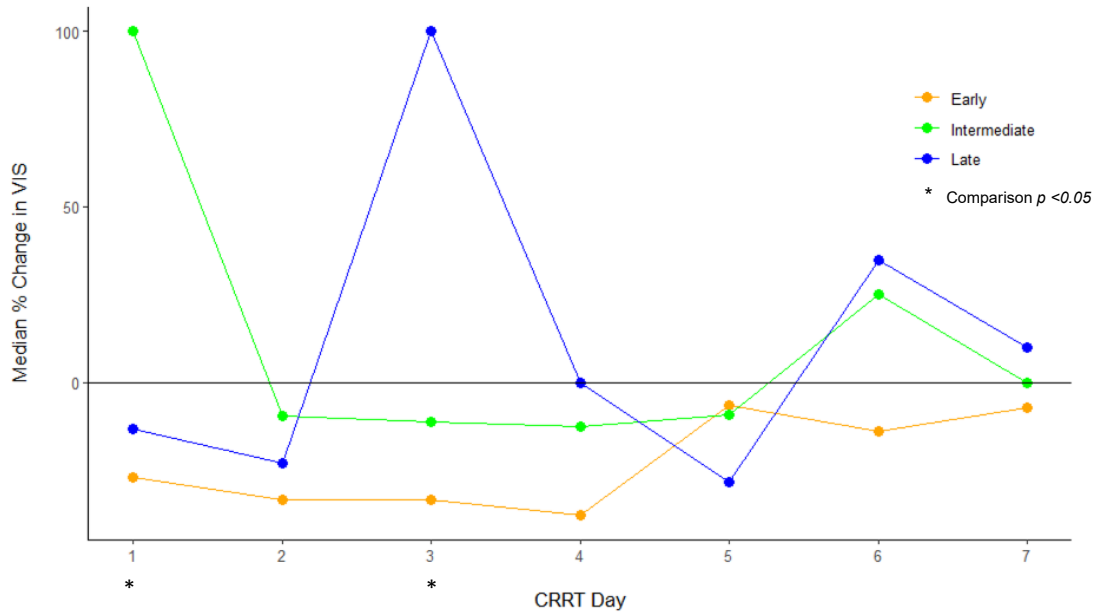

**SUPPLEMENTARY APPENDIX 1: Institutional Review Board (IRB) Information for Each WE-ROCK Site**

|    | <b>Site (City)</b>                                  | <b>Country/State</b> | <b>Principal Investigator(s)</b>   | <b>IRB Board Name</b>                                                                                | <b>IRB #</b>                                                                    | <b>Approval Date</b> |
|----|-----------------------------------------------------|----------------------|------------------------------------|------------------------------------------------------------------------------------------------------|---------------------------------------------------------------------------------|----------------------|
| 1  | Kings College (London)                              | United Kingdom       | Akash Deep                         | Information Governance Department                                                                    | 310522DTA/KCH/Cincinnati                                                        | 5/17/2022            |
| 2  | Bambino Gesu Children’s Hospital                    | Italy                | Gabriella Bottari<br>Valeria Raggi | Bambino Gesu Children’s Hospital Ethics Committee                                                    | n869<br>n870                                                                    | 6/21/2022            |
| 3  | Meyer Children Hospital (Florence)                  | Italy                | Zaccaria Ricci                     | Comitato Etico Pediatrico, Florence Italy                                                            | 32/2022                                                                         | 2/15/2022            |
| 4  | Gregorio Marañón University Hospital (Madrid)       | Spain                | Sarah Fernandez<br>LaFever         | Comité de Ética de la Investigación con Medicamentos Hospital General Universitario Gregorio Marañón | Dict_69_22                                                                      | 12/13/2022           |
| 5  | Medical University (Innsbruck)                      | Austria              | Gerard Cortina                     | Ethics Commission of the Medical University of Innsbruck                                             | 1225/2022                                                                       | 8/25/2022            |
| 6  | Royal Children’s Hospital (Melbourne)               | Australia            | Ben Gelbart                        | Royal Children’s Hospital Melbourne Human Research Ethics Committee                                  | HREC Reference Number: HREC/84977/RCHM-2022<br>RCH HREC Reference Number: 84977 | 6/3/2022             |
| 7  | Hospital for Sick Children (Toronto)                | Canada               | Michael Zappitelli                 | The Hospital for Sick Children                                                                       | 1000078866                                                                      | 11/8/2021            |
| 8  | Stollery Children’s Hospital (Edmonton)             | Canada               | Rashid Alobaidi                    | University of Alberta Research Ethics Board                                                          | Pro00117369                                                                     | 1/24/2022            |
| 9  | Sidra Medicine (Doha)                               | Qatar                | Ahmad Kaddourah                    | Sidra IRB MOPH                                                                                       | 1979858                                                                         | 3/9/2023             |
| 10 | Osaka Municipal General Medical Center (Osaka City) | Japan                | Taiki Haga                         | Osaka Municipal General Medical Center, Administrative Agency                                        | 2302135                                                                         | 8/8/2023             |
| 11 | Cincinnati Children’s Hospital (Cincinnati)         | Ohio                 | Katja Gist                         | Cincinnati Children’s Hospital IRB                                                                   | 2021-0265                                                                       | 7/31/2021            |
| 12 | Seattle Children’s Hospital (Seattle)               | Washington           | Shina Menon                        | Seattle Children’s Hospital IRB                                                                      | STUDY00002682                                                                   | 5/24/2021            |
| 13 | Stanford Children’s Hospital (Palo Alto)            | California           | Michaela Damian                    | Stanford University IRB                                                                              | #63289                                                                          | 11/29/2021           |
| 14 | Mattel Children’s Hospital (Los Angeles)            | California           | Rachana Srivastava                 | University of California Los Angeles IRB                                                             | #22-000626                                                                      | 4/26/2022            |
| 15 | Children’s Hospital Colorado (Aurora)               | Colorado             | Erin Stenson                       | Colorado Multiple IRB                                                                                | COMIRB19-1788                                                                   | 4/9/2021             |

|    |                                                                           |                |                    |                                                               |               |            |
|----|---------------------------------------------------------------------------|----------------|--------------------|---------------------------------------------------------------|---------------|------------|
| 16 | Mercy Children's Hospital (Kansas City)                                   | Kansas         | Kristin Dolan      | Children's Mercy IRB                                          | STUDY00002178 | 2/8/2022   |
| 17 | St Louis Children's Hospital (St. Louis)                                  | Missouri       | Tara Neumyr        | Washington University IRB                                     | 202111077     | 11/15/2021 |
| 18 | University of Iowa Stead Family Children's Hospital (Iowa City)           | Iowa           | Amy Strong         | University of Iowa Human Subjects Office/IRB                  | #202109447    | 10/8/2021  |
| 19 | Texas Children's Hospital (Houston)                                       | Texas          | Sameer Thadani     | Baylor College of Medicine                                    | H-32217       | 11/29/2021 |
| 20 | Nationwide Children's Hospital (Columbus)                                 | Ohio           | Aimee Bigelow      | Nationwide Children's Hospital IRB                            | STUDY0002103  | 9/10/2021  |
| 21 | Children's Hospital of Pittsburgh (Pittsburgh)                            | Pennsylvania   | Dana Fuhrman       | University of Pittsburgh IRB                                  | #21040198     | 5/18/2021  |
| 22 | Riley Children's Hospital (Indianapolis)                                  | Indiana        | Michelle Starr     | Indiana University HRPP                                       | #12121        | 7/9/2021   |
| 23 | University of Minnesota Children's Hospital (Minneapolis)                 | Minnesota      | Shanti Balani      | University of Minnesota                                       | #00015246     | 3/4/2022   |
| 24 | C.S. Mott Children's Hospital (Ann Arbor)                                 | Michigan       | Stephen Gorga      | University of Michigan                                        | HUM00206428   | 12/25/2021 |
| 25 | Children's National (Washington, DC)                                      | --             | Aadil Kakajiwala   | Children's National IRB                                       | Pro00016977   | 12/26/2021 |
| 26 | Maria Fareri Children's Hospital at Westchester Medical Center (Valhalla) | New York       | Sonia Solomon      | New York Medical College IRB                                  | #14813        | 03/23/2022 |
| 27 | Cohen Children's Medical Center (New Hyde Park)                           | New York       | Abby Basalely      | Feinstein Institute of Medical Research Northwell Health IRB  | 21-1250       | 11/23/2021 |
| 28 | Lurie Children's Hospital (Chicago)                                       | Illinois       | Theresa Mottes     | Lurie Children's IRB                                          | 2022-4905     | 11/15/2021 |
| 29 | LeBonheur Children's Hospital (Memphis)                                   | Tennessee      | Pilar Anton-Martin | LeBonheur IRB                                                 | 21-08548-XM   | 1/10/2022  |
| 30 | Medical University of South Carolina (Charleston)                         | South Carolina | David Selewski     | MUSC IRB                                                      | Pro00114501   | 9/30/2021  |
| 31 | Children's of Alabama (Birmingham)                                        | Alabama        | Tennille Webb      | University of Alabama at Birmingham IRB                       | 300008197     | 10/20/2021 |
| 32 | Children's Healthcare of Atlanta (Atlanta)                                | Georgia        | Stella Shin        | Children's Healthcare of Atlanta IRB                          | STUDY00001129 | 7/28/2021  |
| 33 | Omaha Children's Hospital (Omaha)                                         | Nebraska       | Melissa Muff-Luett | University of Nebraska Medical Center IRB                     | 0100-22-EP    | 5/20/2022  |
| 34 | Golisano Children's Hospital (Rochester)                                  | New York       | Susan Martin       | Rochester Subject Review Board at the University of Rochester | STUDY00006703 | 12/13/2021 |

## SUPPLEMENTARY APPENDIX 2:

### STROBE Statement—Checklist of items that should be included in reports of *cohort studies*

|                              | Item No | Recommendation                                                                                                                                                                                                                                                                                                         | Page No |
|------------------------------|---------|------------------------------------------------------------------------------------------------------------------------------------------------------------------------------------------------------------------------------------------------------------------------------------------------------------------------|---------|
| <b>Title and abstract</b>    | 1       | (a) Indicate the study's design with a commonly used term in the title or the abstract<br>(b) Provide in the abstract an informative and balanced summary of what was done and what was found                                                                                                                          | 1,6     |
| <b>Introduction</b>          |         |                                                                                                                                                                                                                                                                                                                        |         |
| Background/rationale         | 2       | Explain the scientific background and rationale for the investigation being reported                                                                                                                                                                                                                                   | 8       |
| Objectives                   | 3       | State specific objectives, including any prespecified hypotheses                                                                                                                                                                                                                                                       | 8-9     |
| <b>Methods</b>               |         |                                                                                                                                                                                                                                                                                                                        |         |
| Study design                 | 4       | Present key elements of study design early in the paper                                                                                                                                                                                                                                                                | 9       |
| Setting                      | 5       | Describe the setting, locations, and relevant dates, including periods of recruitment, exposure, follow-up, and data collection                                                                                                                                                                                        | 9       |
| Participants                 | 6       | (a) Give the eligibility criteria, and the sources and methods of selection of participants. Describe methods of follow-up<br>(b) For matched studies, give matching criteria and number of exposed and unexposed                                                                                                      | 9       |
| Variables                    | 7       | Clearly define all outcomes, exposures, predictors, potential confounders, and effect modifiers. Give diagnostic criteria, if applicable                                                                                                                                                                               | 9-11    |
| Data sources/<br>measurement | 8*      | For each variable of interest, give sources of data and details of methods of assessment (measurement). Describe comparability of assessment methods if there is more than one group                                                                                                                                   | 9-11    |
| Bias                         | 9       | Describe any efforts to address potential sources of bias                                                                                                                                                                                                                                                              | 11      |
| Study size                   | 10      | Explain how the study size was arrived at                                                                                                                                                                                                                                                                              | 9       |
| Quantitative variables       | 11      | Explain how quantitative variables were handled in the analyses. If applicable, describe which groupings were chosen and why                                                                                                                                                                                           | 9-11    |
| Statistical methods          | 12      | (a) Describe all statistical methods, including those used to control for confounding<br>(b) Describe any methods used to examine subgroups and interactions<br>(c) Explain how missing data were addressed<br>(d) If applicable, explain how loss to follow-up was addressed<br>(e) Describe any sensitivity analyses | 11      |
| <b>Results</b>               |         |                                                                                                                                                                                                                                                                                                                        |         |
| Participants                 | 13*     | (a) Report numbers of individuals at each stage of study—eg numbers potentially eligible, examined for eligibility, confirmed eligible, included in the study, completing follow-up, and analysed<br>(b) Give reasons for non-participation at each stage<br>(c) Consider use of a flow diagram                        | 12      |
| Descriptive data             | 14*     | (a) Give characteristics of study participants (eg demographic, clinical, social) and information on exposures and potential confounders<br>(b) Indicate number of participants with missing data for each variable of interest                                                                                        | 12      |

|                          |     |                                                                                                                                                                                                                                                                                                                                                                                                               |           |
|--------------------------|-----|---------------------------------------------------------------------------------------------------------------------------------------------------------------------------------------------------------------------------------------------------------------------------------------------------------------------------------------------------------------------------------------------------------------|-----------|
|                          |     | (c) Summarise follow-up time (eg, average and total amount)                                                                                                                                                                                                                                                                                                                                                   |           |
| Outcome data             | 15* | Report numbers of outcome events or summary measures over time                                                                                                                                                                                                                                                                                                                                                | 12-14     |
| Main results             | 16  | (a) Give unadjusted estimates and, if applicable, confounder-adjusted estimates and their precision (eg, 95% confidence interval). Make clear which confounders were adjusted for and why they were included<br>(b) Report category boundaries when continuous variables were categorized<br>(c) If relevant, consider translating estimates of relative risk into absolute risk for a meaningful time period | 12-14     |
| Other analyses           | 17  | Report other analyses done—eg analyses of subgroups and interactions, and sensitivity analyses                                                                                                                                                                                                                                                                                                                | 12, 13    |
| <b>Discussion</b>        |     |                                                                                                                                                                                                                                                                                                                                                                                                               |           |
| Key results              | 18  | Summarise key results with reference to study objectives                                                                                                                                                                                                                                                                                                                                                      | 14        |
| Limitations              | 19  | Discuss limitations of the study, taking into account sources of potential bias or imprecision. Discuss both direction and magnitude of any potential bias                                                                                                                                                                                                                                                    | 14, 16-17 |
| Interpretation           | 20  | Give a cautious overall interpretation of results considering objectives, limitations, multiplicity of analyses, results from similar studies, and other relevant evidence                                                                                                                                                                                                                                    | 14-16     |
| Generalisability         | 21  | Discuss the generalisability (external validity) of the study results                                                                                                                                                                                                                                                                                                                                         | 16-17     |
| <b>Other information</b> |     |                                                                                                                                                                                                                                                                                                                                                                                                               |           |
| Funding                  | 22  | Give the source of funding and the role of the funders for the present study and, if applicable, for the original study on which the present article is based                                                                                                                                                                                                                                                 | 2         |
